# Supplementary material
Source: PubMed Central journal article supplement (PMC6450336)
Supplement: CJN.09540818SupplementaryData.pdf [file CJN.09540818SupplementaryData.pdf]

## **Secondhand Smoke and Chronic Kidney Disease**

### **Authors:**

Jong Hyun Jhee, Young Su Joo, Youn Kyung Kee, Su-Young Jung, Seohyun Park, Chang-Yun Yoon, Seung Hyeok Han, Tae-Hyun Yoo, Shin-Wook Kang, and Jung Tak Park

### **Supplemental Material Table of Contents**

**Supplemental Table 1.** The prevalence of CKD based on eGFR and proteinuria definition

**Supplemental Table 2.** Relative risk for the prevalence of CKD according to life-time total duration of secondhand smoke

**Supplemental Table 3.** Univariable associations between clinical factors and CKD in cross-sectional and prospective analysis

**Supplemental Table 4.** Relative risk for the prevalence of CKD according to ever smoker vs. never smoker

**Supplemental Table 5.** Relative risk for the prevalence of CKD according to frequency of secondhand smoke exposed at home and work

**Supplemental Table 6.** Baseline characteristics according to exposure location

**Supplemental Table 7.** Baseline characteristics according to two different cohort datasets

**Supplemental Figure 1.** Graphical evaluation of the proportional hazards assumption

**Supplemental Figure 2.** Causal diagram showing assumed associations between baseline secondhand smoke, chronic kidney disease, and baseline characteristics.

## **SUPPLEMENTAL METHODS**

### **Anthropometric and laboratory data**

All subjects received a comprehensive health examination, and filled out questionnaires on health and lifestyle at the time of study entry. Demographic and socioeconomic data, including age, sex, level of education and income, marital status, smoking status, alcohol intake, degree of physical activity, and medical histories were also collected. Anthropometric parameters such as height, body weight, and waist and hip circumferences were measured by skilled study workers following standard methods while the subjects were wearing light clothes. Body mass index (BMI) and waist-to-hip ratio were calculated as the weight divided by height squared ( $\text{kg}/\text{m}^2$ ) and the waist circumference divided by the hip circumference, respectively. The level of education was divided into three groups: low, lower than middle school; middle, middle school; high, higher than middle school. The level of income was divided into three groups: low,  $< \$850$  per month; middle,  $\$850$  to  $\$1,700$  per month; high,  $\geq \$1,700$  per month. Physical activities were expressed as the metabolic equivalent of task. Subjects who had a history of hypertension, with a blood pressure of  $\geq 140/90$  mm Hg, or were taking antihypertensive agents were considered hypertensive. Those who had a medical history of diabetes, blood glucose levels  $\geq 126$  mg/dL in an 8-h fasting status, postload glucose levels  $\geq 200$  mg/dL after a 75-g oral glucose tolerance test, HbA1c  $\geq 6.5\%$ , or were receiving oral medication and/or insulin treatment for hyperglycemia were considered as having diabetes. Subjects with a medical history of dyslipidemia or taking medication for lipid control were considered as having dyslipidemia. Cardiovascular disease was defined as the composite of myocardial infarction, congestive heart failure, coronary artery disease, peripheral artery disease, and/or cerebrovascular accident.

The following biochemical data were determined by using fasting blood samples: concentrations of sodium, blood urea nitrogen, creatinine, hemoglobin, glucose, HbA1c, albumin, total cholesterol, triglyceride, high-density lipoprotein cholesterol (HDL-C), low-density lipoprotein cholesterol (LDL-C), and C-reactive protein. LDL-C was calculated by using the Friedewald formula (1). Urine samples were collected in the morning after the first voiding. Fresh urine samples were analyzed by using URISCAN Pro II (YD Diagnostics Corp., Seoul, Korea).

### **Reference**

1. Friedewald WT, Levy RI, Fredrickson DS: Estimation of the concentration of low-density lipoprotein cholesterol in plasma, without use of the preparative ultracentrifuge. *Clin Chem* 18(6): 499-502, 1972.

Supplemental material is neither peer-reviewed nor thoroughly edited by CJASN. The authors alone are responsible for the accuracy and presentation of the material.

**Supplemental Table 1.** The prevalence of CKD based on eGFR and proteinuria definition\*

|                                      | Case (%)          | Model 1          |        | Model 2          |        | Model 3          |        | Model 4          |        |
|--------------------------------------|-------------------|------------------|--------|------------------|--------|------------------|--------|------------------|--------|
|                                      |                   | OR (96% CI)      | P      |
| <b>Secondhand smoke (yes vs. no)</b> | 358/16,694 (2)    | 1.23 (1.10-1.38) | <0.001 | 1.45 (1.27-1.66) | <0.001 | 1.37 (1.19-1.58) | <0.001 | 1.44 (1.26-1.65) | <0.001 |
| <b>Secondhand smoke frequency</b>    |                   |                  |        |                  |        |                  |        |                  |        |
| No-exposure                          | 2,627/114,502 (2) | 1.00 (reference) |        | 1.00 (reference) |        | 1.00 (reference) |        | 1.00 (reference) |        |
| <3 days/week                         | 80/3,710 (2)      | 1.34 (1.07-1.69) | 0.01   | 1.74 (1.35-2.25) | <0.001 | 1.59 (1.21-2.10) | 0.001  | 1.72 (1.33-2.22) | <0.001 |
| ≥3 days/week                         | 278/12,984 (9)    | 1.20 (1.06-1.36) | 0.01   | 1.37 (1.17-1.60) | <0.001 | 1.31 (1.11-1.54) | 0.001  | 1.37 (1.17-1.60) | <0.001 |

*Note:* \*CKD was defined as eGFR < 60 mL/min/1.73 m<sup>2</sup> or having higher than trace level proteinuria according to dipstick test results.

**Model 1:** Adjustment for age and sex

**Model 2:** Model 1 + demographic factors including BMI, systolic BP, history of hypertension, history of diabetes, alcohol status, education levels, income levels, and marital status

**Model 3:** Model 2 + laboratory factors including hemoglobin and serum albumin

**Model 4:** Adjustment for age, sex, history of hypertension, history of diabetes, alcohol status, education levels, income levels, and marital status

**Abbreviations:** CKD, chronic kidney disease; eGFR, estimated glomerular filtration rate; OR, odds ratio; CI, confidence; BMI, body mass index

Supplemental material is neither peer-reviewed nor thoroughly edited by CJASN. The authors alone are responsible for the accuracy and presentation of the material.

**Supplemental Table 2.** Relative risk for the prevalence of CKD according to life-time total duration of secondhand smoke (n = 125,371)\*

|                                           | Case (%)          | Model 1          |        | Model 2          |        | Model 3          |        | Model 4          |        |
|-------------------------------------------|-------------------|------------------|--------|------------------|--------|------------------|--------|------------------|--------|
|                                           |                   | OR (96% CI)      | P      |
| <b>Secondhand smoke exposure duration</b> |                   |                  |        |                  |        |                  |        |                  |        |
| No-exposure                               | 2,274/114,502 (2) | 1.00 (reference) |        | 1.00 (reference) |        | 1.00 (reference) |        | 1.00 (reference) |        |
| <10 years                                 | 40/3,018 (1)      | 1.09 (0.79-1.50) | 0.61   | 1.22 (0.86-1.74) | 0.26   | 1.09 (0.75-1.58) | 0.66   | 1.19 (0.84-1.69) | 0.34   |
| 10-19 years                               | 42/3,022 (1)      | 1.43 (1.04-1.95) | 0.03   | 1.46 (1.02-2.09) | 0.04   | 1.28 (0.87-1.87) | 0.21   | 1.47 (1.03-2.08) | 0.03   |
| ≥20 years                                 | 144/4,829 (3)     | 1.52 (1.28-1.82) | <0.001 | 1.65 (1.34-2.03) | <0.001 | 1.62 (1.30-2.01) | <0.001 | 1.61 (1.31-2.00) | <0.001 |

**Note:** \*Analysis was done in 125,371 subjects who had full information regarding life-time total secondhand smoke exposure duration.

**Model 1:** Adjustment for age and sex

**Model 2:** Model 1 + demographic factors including BMI, systolic BP, history of hypertension, history of diabetes, alcohol status, education levels, income levels, and marital status

**Model 3:** Model 2 + laboratory factors including hemoglobin and serum albumin

**Model 4:** Adjustment for age, sex, history of hypertension, history of diabetes, education levels, income levels, and marital status

**Abbreviations:** CKD, chronic kidney disease; OR, odds ratio; CI, confidence; BMI, body mass index; SBP, systolic blood pressure

**Supplemental Table 3.** Univariable associations between clinical factors and CKD in cross-sectional and prospective analysis

|                                         | Cross-sectional analysis |        | Prospective analysis |        |
|-----------------------------------------|--------------------------|--------|----------------------|--------|
|                                         | OR (95% CI)*             | P      | HR (95% CI)†         | P      |
| Age (per 1 year)                        | 1.16 (1.15-1.17)         | <0.001 | 1.12 (1.10-1.14)     | <0.001 |
| Sex (female vs. male)                   | 1.60 (1.47-1.74)         | <0.001 | 1.45 (1.01-2.08)     | 0.04   |
| BMI (per 1 kg/m <sup>2</sup> )          | 1.11 (1.10-1.13)         | <0.001 | 1.08 (1.04-1.11)     | <0.001 |
| SBP (per 1 mmHg)                        | 1.02 (1.01-1.03)         | <0.001 | 1.02 (1.01-1.03)     | <0.001 |
| Alcohol status (yes vs. no)             | 0.80 (0.77-0.84)         | <0.001 | 0.74 (0.65-0.84)     | <0.001 |
| Education levels                        |                          |        |                      |        |
| ≤Elementary                             | reference                |        | reference            |        |
| Middle–high school                      | 0.48 (0.44-0.53)         | <0.001 | 0.44 (0.35-0.55)     | <0.001 |
| ≥College                                | 0.48 (0.43-0.53)         | <0.001 | 0.42 (0.26-0.68)     | <0.001 |
| Income levels                           |                          |        |                      |        |
| Low                                     | reference                |        | reference            |        |
| Intermediate                            | 0.51 (0.46-0.57)         | <0.001 | 0.52 (0.40-0.68)     | <0.001 |
| High                                    | 0.31 (0.27-0.34)         | <0.001 | 0.48 (0.34-0.68)     | <0.001 |
| Marital status (yes vs. no)             | 0.57 (0.51-0.63)         | <0.001 | 0.52 (0.36-0.74)     | <0.001 |
| Hypertension (yes vs. no)               | 4.91 (4.54-5.31)         | <0.001 | 2.62 (1.82-3.77)     | <0.001 |
| Diabetes (yes vs. no)                   | 4.34 (3.94-4.78)         | <0.001 | 2.31 (1.78-2.99)     | <0.001 |
| Hemoglobin (per 1 g/dL)                 | 0.89 (0.86-0.91)         | <0.001 | 1.09 (1.01-1.18)     | 0.03   |
| Albumin (per 1 g/dL)                    | 0.72 (0.62-0.83)         | <0.001 | 0.55 (0.37-0.81)     | 0.01   |
| eGFR (per 1 mL/min/1.73m <sup>2</sup> ) | N/A                      |        | 0.95 (0.94-0.96)     | <0.001 |
| Total cholesterol (per 1 mg/dL)         | 1.00 (0.99-1.01)         | 0.40   | 1.01 (1.00-1.02)     | <0.001 |

**Note:** \*Univariable logistic regression analysis was performed with CKD and each clinical factor.

†Univariable Cox analysis was performed for incident CKD and each clinical factor.

**Abbreviations:** BMI, body mass index; SBP, systolic blood pressure; eGFR, estimated glomerular filtration rate; N/A, not applicable

Supplemental material is neither peer-reviewed nor thoroughly edited by CJASN. The authors alone are responsible for the accuracy and presentation of the material.

**Supplemental Table 4.** Relative risk for the prevalence of CKD according to ever smoker vs. never smoker (n\* = 157,814)

| Case (%)              | Model 1           |                  | Model 2          |                  | Model 3          |                  | Model 4          |                  |        |
|-----------------------|-------------------|------------------|------------------|------------------|------------------|------------------|------------------|------------------|--------|
|                       | OR (96% CI)       | P                | OR (96% CI)      | P                | OR (96% CI)      | P                | OR (96% CI)      | P                |        |
| <b>Smoking status</b> |                   |                  |                  |                  |                  |                  |                  |                  |        |
| Never smoker          | 2,575/131,196 (2) | 1.00 (reference) |        |
| Ever smoker           | 731/26,618 (3)    | 1.35 (1.23-1.49) | <0.001           | 1.35 (1.21-1.51) | <0.001           | 1.32 (1.18-1.48) | <0.001           | 1.37 (1.22-1.53) | <0.001 |

**Note:** \*Non-smokers (131,196) plus current or ex-smokers who were initially excluded from the main analysis (26,618), Ever smokers include current and ex-smokers.

**Model 1:** Adjustment for age and sex

**Model 2:** Model 1 + demographic factors including BMI, systolic BP, history of hypertension, history of diabetes, alcohol status, education levels, income levels, and marital status

**Model 3:** Model 2 + laboratory factors including hemoglobin and serum albumin

**Model 4:** Adjustment for age, sex, history of hypertension, history of diabetes, education levels, income levels, and marital status

**Abbreviations:** CKD, chronic kidney disease; OR, odds ratio; CI, confidence; BMI, body mass index; SBP, systolic blood pressure

Supplemental material is neither peer-reviewed nor thoroughly edited by CJASN. The authors alone are responsible for the accuracy and presentation of the material.

**Supplemental Table 5.** Relative risk for the prevalence of CKD according to frequency of secondhand smoke exposed at home and work

|                                   | At home          |          | At work          |          |
|-----------------------------------|------------------|----------|------------------|----------|
|                                   | OR (95% CI)      | <i>P</i> | OR (95% CI)      | <i>P</i> |
| <b>Secondhand smoke frequency</b> |                  |          |                  |          |
| No-exposure                       | 1.00 (reference) |          | 1.00 (reference) |          |
| <3 days/week                      | 1.83 (1.18-2.84) | 0.01     | 1.63 (1.11-2.40) | 0.01     |
| ≥3 days/week                      | 1.66 (1.35-2.04) | <0.001   | 1.02 (0.74-1.39) | 0.38     |

Models were adjustment for age, sex, history of hypertension, history of diabetes, education levels, income levels, and marital status

**Abbreviations:** CKD, chronic kidney disease; OR, odds ratio; CI, confidence; BMI, body mass index; BP, blood pressure



**Supplemental Table 6.** Baseline characteristics according to exposure location

| <b>Characteristics</b>             | <b>At home only<br/>(n = 10,020)</b> | <b>At work only<br/>(n = 4,011)</b> |
|------------------------------------|--------------------------------------|-------------------------------------|
| <b>Secondhand smoke exposure</b>   |                                      |                                     |
| Total duration (year)              | 24 ± 12                              | 14 ± 12                             |
| <b>Demographic data</b>            |                                      |                                     |
| Age (years)                        | 52 ± 8                               | 50 ± 7                              |
| Female                             | 9,819 (98.0)                         | 2,428 (58.2)                        |
| BMI (kg/m <sup>2</sup> )           | 24 ± 3                               | 24 ± 3                              |
| Alcohol status (ever)              | 6,178 (62.0)                         | 1,650 (39.7)                        |
| Physical activity (yes)            | 4,136 (49.2)                         | 1,949 (51.9)                        |
| Married (yes)                      | 7,584 (90.4)                         | 3,149 (84.1)                        |
| Education status                   |                                      |                                     |
| ≤Elementary                        | 3,380 (34.1)                         | 801 (19.4)                          |
| Middle–high school                 | 5,249 (52.9)                         | 2,382 (57.6)                        |
| ≥College                           | 1,288 (13.0)                         | 950 (23.0)                          |
| Income                             |                                      |                                     |
| Low                                | 1,636 (20.0)                         | 340 (9.6)                           |
| Intermediate                       | 3,714 (45.3)                         | 1,594 (44.8)                        |
| High                               | 2,846 (34.7)                         | 1,625 (45.7)                        |
| Systolic BP (mm Hg)                | 121.5 ± 16.9                         | 121.7 ± 15.6                        |
| Diastolic BP (mm Hg)               | 76.4 ± 10.5                          | 77.3 ± 10.5                         |
| <b>Comorbidities</b>               |                                      |                                     |
| Hypertension                       | 1,844 (18.4)                         | 663 (15.9)                          |
| Diabetes                           | 573 (5.7)                            | 225 (5.4)                           |
| Dyslipidemia                       | 655 (7.8)                            | 247 (6.6)                           |
| Cardiovascular events              | 94 (1.1)                             | 37 (1.0)                            |
| <b>Laboratory data</b>             |                                      |                                     |
| eGFR (mL/min/1.73 m <sup>2</sup> ) | 90.1 ± 14.4                          | 90.0 ± 13.9                         |
| Hemoglobin (g/dL)                  | 13.0 ± 1.2                           | 13.8 ± 1.5                          |
| Albumin (g/dL)                     | 4.6 ± 0.3                            | 4.7 ± 0.3                           |
| Glucose (mg/dL)                    | 94 ± 23                              | 94 ± 19                             |
| HbA1c (%)                          | 5.7 ± 0.9                            | 5.7 ± 0.9                           |
| Total cholesterol (mg/dL)          | 199 ± 36                             | 195 ± 35                            |
| Triglyceride (mg/dL)               | 120 ± 80                             | 120 ± 82                            |
| HDL-C (mg/dL)                      | 55 ± 12                              | 54 ± 13                             |
| LDL-C (mg/dL)                      | 120 ± 32                             | 117 ± 31                            |
| hs-CRP (mg/dL)                     | 0.1 [0.0-0.2]                        | 0.1 [0.0-0.1]                       |

**Note:** Data are presented as mean ± standard deviation, median [interquartile range], or number (%).

**Abbreviations:** BMI, body mass index; eGFR, estimated glomerular filtration rate; HDL-C, high-density lipoprotein cholesterol; LDL-C, low-density lipoprotein cholesterol; hs-CRP, high-sensitivity C-reactive protein

**Supplemental Table 7.** Baseline characteristics according to two different cohort datasets

| Characteristics                    | KoGES_HEXa study<br>(n = 128,912) | KoGES_Ansan-Anseong study<br>(n = 1,948) |
|------------------------------------|-----------------------------------|------------------------------------------|
| <b>Demographic data</b>            |                                   |                                          |
| Age (years)                        | 54 ± 8                            | 52 ± 9                                   |
| Female                             | 99,262 (77)                       | 1,626 (84)                               |
| BMI (kg/m <sup>2</sup> )           | 24 ± 3                            | 25 ± 3                                   |
| Alcohol status (ever)              | 51,564 (40)                       | 662 (34)                                 |
| Physical activity (yes)            | 67,034 (52)                       | 1,363 (70)                               |
| Married (yes)                      | 109,575 (85)                      | 1,714 (88)                               |
| Education status                   |                                   |                                          |
| ≤Elementary                        | 24,493 (19)                       | 1,227 (63)                               |
| Middle–high school                 | 70,901 (55)                       | 681 (35)                                 |
| ≥College                           | 33,517 (26)                       | 38 (2)                                   |
| Income                             |                                   |                                          |
| Low                                | 14,180 (11)                       | 720 (37)                                 |
| Intermediate                       | 46,408 (36)                       | 896 (46)                                 |
| High                               | 48,986 (38)                       | 292 (15)                                 |
| Systolic BP (mm Hg)                | 122 ± 16                          | 121 ± 19                                 |
| Diastolic BP (mm Hg)               | 76 ± 10                           | 80 ± 12                                  |
| <b>Comorbidities</b>               |                                   |                                          |
| Hypertension                       | 25,782 (20)                       | 311 (16)                                 |
| Diabetes                           | 7,734 (6)                         | 117 (6)                                  |
| Dyslipidemia                       | 11,602 (9)                        | 37 (2)                                   |
| Cardiovascular events              | 1,289 (1)                         | 19 (1)                                   |
| <b>Laboratory data</b>             |                                   |                                          |
| eGFR (mL/min/1.73 m <sup>2</sup> ) | 91 ± 14                           | 95 ± 14                                  |
| Hemoglobin (g/dL)                  | 13.6 ± 1.4                        | 12.8 ± 1.4                               |
| Albumin (g/dL)                     | 4.6 ± 0.3                         | 4.5 ± 0.3                                |
| Glucose (mg/dL)                    | 94 ± 21                           | 91 ± 21                                  |
| HbA1c (%)                          | 5.7 ± 0.8                         | 5.7 ± 0.7                                |
| Total cholesterol (mg/dL)          | 198 ± 36                          | 198 ± 36                                 |
| Triglyceride (mg/dL)               | 121 ± 83                          | 139 ± 98                                 |
| HDL-C (mg/dL)                      | 55 ± 13                           | 51 ± 12                                  |
| LDL-C (mg/dL)                      | 119 ± 32                          | 120 ± 33                                 |
| hs-CRP (mg/dL)                     | 0.1 [0.0-0.2]                     | 0.1 [0.1-0.2]                            |

**Note:** Data are presented as mean ± standard deviation, median [interquartile range], or number (%).

**Abbreviations:** BMI, body mass index; eGFR, estimated glomerular filtration rate; HDL-C, high-density lipoprotein cholesterol; LDL-C, low-density lipoprotein cholesterol; hs-CRP, high-sensitivity C-reactive protein

Supplemental material is neither peer-reviewed nor thoroughly edited by CJASN. The authors alone are responsible for the accuracy and presentation of the material.

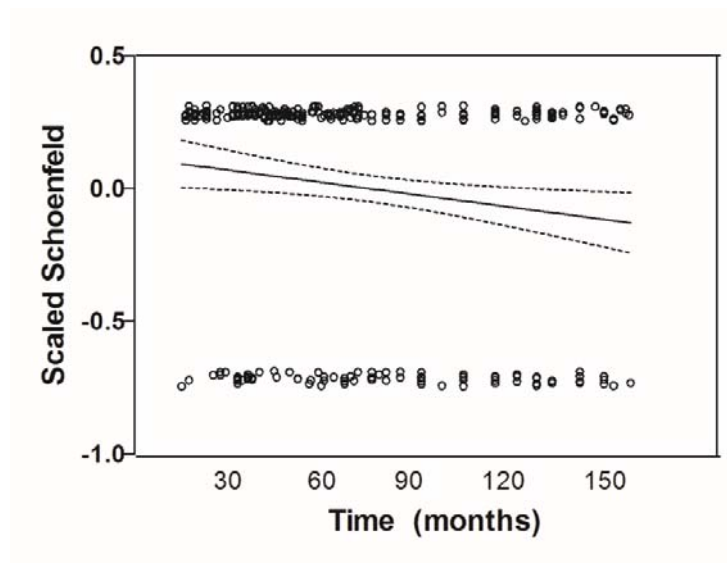

**Supplemental Figure 1.** Graphical evaluation of the proportional hazards assumption using scaled Schoenfeld residuals in univariable Cox proportional hazards models for the association of chronic kidney disease with the frequency of secondhand smoke exposure

**Note:**  $P$ -value for slope = 0.93. Dots represents Schoenfeld residuals. Solid line is a smoothing spline fit to the plot with the dashed lines representing a 2-standard error band around the fit.

Supplemental material is neither peer-reviewed nor thoroughly edited by CJASN. The authors alone are responsible for the accuracy and presentation of the material.

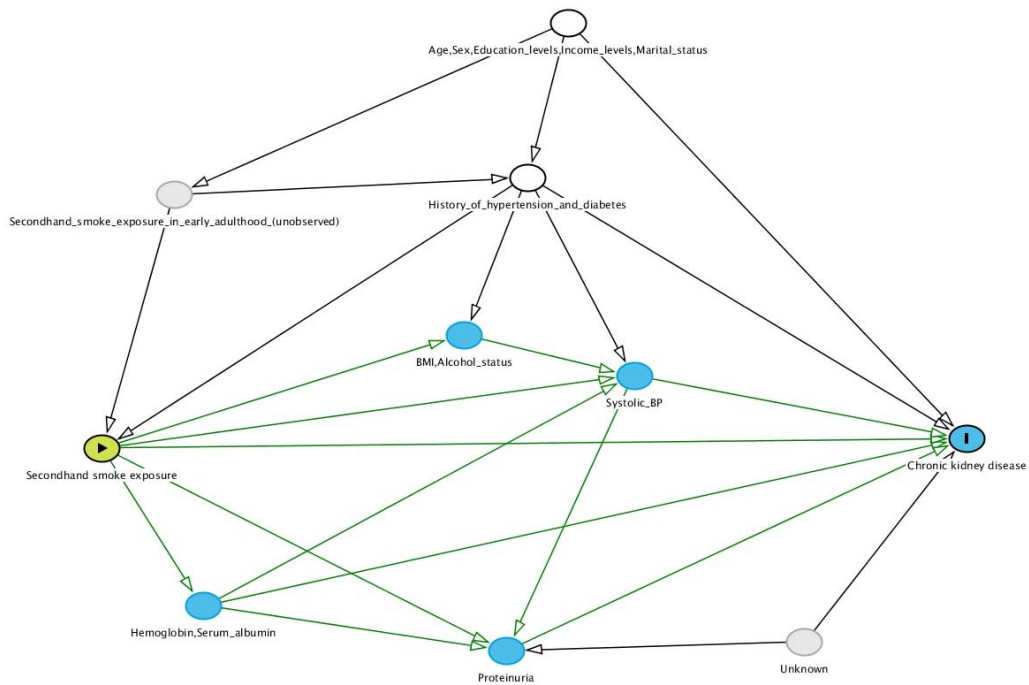

**Supplemental Figure 2.** Causal diagram showing assumed associations between baseline secondhand smoke, chronic kidney disease, and baseline characteristics. Variables with white circles are considered to be confounders and those with blue circles are considered to be effect mediator.

**Note:** Constructed with <http://www.dagitty.net>.

**Abbreviations:** BP, blood pressure
